# Supplementary material for: The Critical Care Society of Southern Africa Consensus Statement on ICU Triage and Rationing (ConICTri)
Source: PubMed Central journal article supplement — South Afr J Crit Care. 2019 Aug 15;35(1b):10.7196/SAJCC.2019.v35.i1b.383. doi: 10.7196/SAJCC.2019.v35.i1b.383 (PMC10503494; doi:10.7196/sajcc.2019.v35.i1b.383), 2019-08-15
Supplement: SAJCC-35-1b-383-S001.pdf [file SAJCC-35-1b-383-S001.pdf]

**Appendix: Author affiliations**

| Name                | Affiliation                                                                                                                                                                                                                                                                                                                | Biography                                                                                                                                                                                                                                                                                                                                                                                                                                                                                                                                                                                                                                                                                                                                                                                                                                                        |
|---------------------|----------------------------------------------------------------------------------------------------------------------------------------------------------------------------------------------------------------------------------------------------------------------------------------------------------------------------|------------------------------------------------------------------------------------------------------------------------------------------------------------------------------------------------------------------------------------------------------------------------------------------------------------------------------------------------------------------------------------------------------------------------------------------------------------------------------------------------------------------------------------------------------------------------------------------------------------------------------------------------------------------------------------------------------------------------------------------------------------------------------------------------------------------------------------------------------------------|
| Gavin Joynt         | Chairman and Professor, Department of Anaesthesia and Intensive Care, The Chinese University of Hong Kong<br>Honorary Chief of Service, Anaesthesia and Intensive Care, Prince of Wales Hospital, Hong Kong<br>Honorary Professor, School of Clinical Medicine, Royal Brisbane Clinical Unit, The University of Queensland | Gavin Joynt trained in Anaesthesia and Intensive Care at Baragwanath Hospital, South Africa. He is past Chairman of the Board of Intensive Care of the Hong Kong College of Anaesthesiology, and council member of the Hong Kong Society of Intensive Care Medicine and the College of Intensive Care Medicine of Australia and New Zealand. He has participated in a number of consensus meetings, and published several research papers, editorials and book chapters related to triage, epidemic triage and end-of-life care. Research and special interests include ICU education, medical ethics, infection control, and antibiotic pharmacokinetics. Researcher ID C-7606-2009, ORCID <a href="https://orcid.org/0000-0002-5823-3435">https://orcid.org/0000-0002-5823-3435</a>                                                                            |
| Dean Gopalan        | Chief Specialist and Head of Department of Anaesthesiology & Critical Care, School of Clinical Medicine, University of KwaZulu-Natal, Durban, South Africa                                                                                                                                                                 | Dean Gopalan's qualifications are MB ChB (Natal), FCA (SA), CritCare(SA). He is Head of Department and an anaesthesiologist/intensivist at King Edward VIII and Inkosi Albert Luthuli Hospitals, Durban, South Africa. He is the current President of CCSSA, and is President of Council of the College of Anaesthetists of CMSA. His research interests include ethical decision-making in ICU, medical education, and training in low-middle-income countries.                                                                                                                                                                                                                                                                                                                                                                                                 |
| Andrew Argent       | Professor, Head of Department Paediatrics and Child Health, University of Cape Town and Red Cross War Memorial Children's Hospital, Cape Town, South Africa                                                                                                                                                                | Andrew Argent has worked in the paediatric intensive care unit (PICU) at the Red Cross War Memorial Children's Hospital since 1988. He has been Director of the PICU since 1999, and has been involved in the development of admission criteria in that unit. He is a previous president of the Critical Care Society of Southern Africa, and the World Federation of Paediatric Intensive and Critical Care Societies. He has published several research papers in the domain paediatric intensive care, including decision-making in resource restricted environments. Currently he is involved in guideline development in the area of paediatric transfusions and management of sepsis.                                                                                                                                                                      |
| Sean Chetty         | Head, Clinical Department - Anaesthesiology & Critical Care, Stellenbosch University and Tygerberg Hospital, Cape Town, South Africa                                                                                                                                                                                       | Sean Chetty is an anaesthetic intensivist working at the University of Stellenbosch, in Cape Town, South Africa. His areas of research interest include the management of pain and sedation in the critically ill patient and acute pain management of the obstetric patient. Sean Chetty has focused his attention on optimising critical care services within resource-constrained environments, in order to ensure that indigent patients can access the high level of care required. He has a passion for expanding medical education and is regularly involved in knowledge expansion initiatives for healthcare professionals in South Africa and internationally. He is the previous past chairman of the Egoli branch of the Critical Care Society of Southern Africa. He is also an executive committee member of the SA Society of Anaesthesiologists. |
| Robert Wise         | Head, Clinical Unit Critical Care, Edendale Hospital, Pietermaritzburg. Discipline of Anaesthesiology and Critical Care, School of Clinical Medicine, University of KwaZulu-Natal, Durban, South Africa                                                                                                                    | Rob Wise specialised in anaesthesiology at the University of KwaZulu-Natal. He was awarded a Master's in Medicine and subspecialised in Critical Care Medicine, and is currently completing a PhD. He has served as president of the KwaZulu-Natal branch of the CCSSA, is a member of the South African Peri-Operative Research Group, a member of the CCSSA Research and Education Committee, and also works on the Clinical Trials Working Group of the World Society of Abdominal Compartment Syndrome. He has particular interests in data collection/systems management and resource allocation, rational blood use, and innovation in resource-poor areas.                                                                                                                                                                                                |
| Veronica Ka Wai Lai | Department of Anaesthesia and Intensive Care, The Chinese University of Hong Kong                                                                                                                                                                                                                                          | Veronica Ka Wai Lai has completed a PhD at the Department of Anaesthesia and Intensive Care, The Chinese University of Hong Kong. Her undergraduate degree majored in psychology and she has published papers in education and clinical medicine. Researcher ID O-5672-2015.                                                                                                                                                                                                                                                                                                                                                                                                                                                                                                                                                                                     |

|                        |                                                                                                                                                                          |                                                                                                                                                                                                                                                                                                                                                                                                                                                                                                                                                                                                                                                                                                                                                                                                                                                                                                                                                                                                   |
|------------------------|--------------------------------------------------------------------------------------------------------------------------------------------------------------------------|---------------------------------------------------------------------------------------------------------------------------------------------------------------------------------------------------------------------------------------------------------------------------------------------------------------------------------------------------------------------------------------------------------------------------------------------------------------------------------------------------------------------------------------------------------------------------------------------------------------------------------------------------------------------------------------------------------------------------------------------------------------------------------------------------------------------------------------------------------------------------------------------------------------------------------------------------------------------------------------------------|
| Eric Hodgson           | Chief Specialist, Department of Anaesthesia, Critical Care and Pain Management at Nelson R Mandela School of Medicine, University of KwaZulu-Natal, Durban, South Africa | Eric Hodgson is a specialist anaesthesiologist with subspecialty registration in critical care. He has worked as an intensivist in both the state (Addington Hospital) and private sectors in eThekweni-Durban, and has served on the Councils of the SA Society of Anaesthesiologists and Critical Care Society of SA. Eric received the President's Award from the CCSSA in 2011 and a Travelling Fellowship from SASA in 2007. Eric has a special interest in the management of acute and chronic pain, is a founder member of Pain SA and a contributing author to the SA Acute and Cancer Pain guidelines. Eric is currently the chief specialist anaesthesiologist and a pain physician at Inkosi Albert Luthuli Central Hospital and an honorary clinical associate of the Department of Anaesthesia, Critical Care and Pain Management at Nelson R Mandela School of Medicine, University of KwaZulu-Natal. He has published on ethical issues related to intensive care in South Africa. |
| Anna Lee               | Professor, Department of Anaesthesia and Intensive Care, The Chinese University of Hong Kong                                                                             | Anna Lee is an epidemiologist at the Department of Anaesthesia and Intensive Care, The Chinese University of Hong Kong. She is an editor for both the Cochrane Anaesthesia, and Emergency and Critical Care Groups. She has published papers related to triage, end-of-life, medical ethics, patient education and a diverse range of topics examined in systematic reviews. Researcher ID B-2773-2009. ORCID <a href="https://orcid.org/0000-0003-2864-0045">https://orcid.org/0000-0003-2864-0045</a>                                                                                                                                                                                                                                                                                                                                                                                                                                                                                           |
| Ivan Joubert           | Director of Critical Care, Groote Schuur Hospital, Cape Town, South Africa                                                                                               | Ivan Joubert is currently President of the Critical Care Society of Southern Africa, and Head of Critical Care, Groote Schuur Hospital and the University of Cape Town. He is Chair of the Committee of Critical Care of the Colleges of Medicine of South Africa, and Chair of the Critical Care Forum for the Provincial Government of the Western Cape.                                                                                                                                                                                                                                                                                                                                                                                                                                                                                                                                                                                                                                        |
| Sam Mokgokong          | Department of Neurosurgery, University of Pretoria. Past President: Health Professions Council of South Africa                                                           | Sam Mokgokong is a practising neurosurgeon and an intensivist. He recently retired as Head of the Department of Neurosurgery at the University of Pretoria. He is a recently retired long-serving council member of the CCSSA.                                                                                                                                                                                                                                                                                                                                                                                                                                                                                                                                                                                                                                                                                                                                                                    |
| Stephilia Tshukutsoane | Critical Care Nurse, Chris Hani Baragwanath Academic Hospital, Soweto, Johannesburg, South Africa                                                                        | Critical care trained nurse working at Chris Hani Baragwanath Academic Hospital. She is heavily involved in clinical trials research within the unit, and has been study coordinator for numerous clinical trials across all disciplines.                                                                                                                                                                                                                                                                                                                                                                                                                                                                                                                                                                                                                                                                                                                                                         |
| Guy Richards           | Academic Head and Professor of Critical Care, Faculty of Health Sciences, University of the Witwatersrand, Johannesburg, South Africa                                    | Guy Richards' qualifications are MB BCH, PhD, FCP(SA) and FRCP. He is the Director of Critical Care at Charlotte Maxeke Johannesburg Academic Hospital. He has delivered more than 500 invited presentations at national and international congresses. He has received numerous research awards, and was awarded the Mandela Medal in Gold by the President for distinguished service related to the passing of Nelson Mandela in 2014. He has authored 11 book chapters and 156 peer-reviewed indexed scientific papers. His RG score on ResearchGate is 40.91 and his research has been cited 2 309 times. His 'h index' is 27. He is a reviewer for many critical care and pulmonology journals.                                                                                                                                                                                                                                                                                               |
| Colin Menezes          | Academic Head and Associate Professor, Department of Internal Medicine, Faculty of Health Sciences, University of the Witwatersrand, Johannesburg, South Africa          | Colin Menezes is an Associate Professor and Academic Head of the Department of Internal Medicine at the University of the Witwatersrand. He is also the Clinical Head of the Division of Infectious Diseases and a senior specialist in a General Internal Medicine Unit, Chris Hani Baragwanath Academic Hospital, in Soweto. In addition to his research interests in infectious diseases, he also has an interest in health law and medical ethics - he is the chair of his hospital clinical review committee, and assists his local provincial department with medico-legal cases. ORCID <a href="https://orcid.org/0000-0003-3838-5359">https://orcid.org/0000-0003-3838-5359</a> .                                                                                                                                                                                                                                                                                                         |

|                      |                                                                                                                                                                                                                             |                                                                                                                                                                                                                                                                                                                                                                                                                                                                                                                                                                                                                                                                                                                                                                                                                                                                                                                                         |
|----------------------|-----------------------------------------------------------------------------------------------------------------------------------------------------------------------------------------------------------------------------|-----------------------------------------------------------------------------------------------------------------------------------------------------------------------------------------------------------------------------------------------------------------------------------------------------------------------------------------------------------------------------------------------------------------------------------------------------------------------------------------------------------------------------------------------------------------------------------------------------------------------------------------------------------------------------------------------------------------------------------------------------------------------------------------------------------------------------------------------------------------------------------------------------------------------------------------|
| Lufuno Rudo Mathivha | Adjunct Professor in Critical Care, Department of Critical Care Medicine, University of the Witwatersrand. Medical Director of Intensive Care, Chris Hani Baragwanath Academic Hospital, Soweto, Johannesburg, South Africa | L R Mathivha is the first black South African woman to study critical care. She graduated from the University of Natal (South Africa), completed a paediatric residency at Chris Hani Baragwanath Academic Hospital before embarking to North Carolina USA. At Duke University, she completed a fellowship in Paediatric Critical Care. She is Director of Critical Care Medicine at Chris Hani Baragwanath Academic Hospital; Vice President of the Society of Critical Care of Southern Africa; Past Chairperson of the South African Medical Association's Committee of Education, Science and Technology; Member of the Ministerial Committees of Health Technology Management and Revitalization of Emergency Medical Services. She runs a combined adult and paediatric critical care fellowship programme.                                                                                                                       |
| Bronwen Espen        | Clinical Facilitator, Centre for Health Professions Education, Stellenbosch University, Cape Town, South Africa                                                                                                             | Bronwen Espen is a registered critical care nurse and an experienced educator with an interest in clinical simulation, particularly focusing on communication skills and teamwork. She is a council member of CCSSA.                                                                                                                                                                                                                                                                                                                                                                                                                                                                                                                                                                                                                                                                                                                    |
| Brian Levy           | Anaesthesiologist and critical care specialist, private practice                                                                                                                                                            | Brian Levy is an anaesthetist intensivist in private practice. He is a co-founder of Nesibopho Healthcare, a institution that promotes expert consensus and evidence-based intensive care practice. He is currently also treasurer and private practice portfolio head of the CCSSA.                                                                                                                                                                                                                                                                                                                                                                                                                                                                                                                                                                                                                                                    |
| Kwanele Asante       | Lawyer, bioethicist, African cancer equity activist                                                                                                                                                                         | Kwanele Asante is the Former Chairperson of the Ministerial Advisory Committee on Cancer Prevention and Control in South Africa. She taught Health Law at the Steve Biko Centre for Bioethics, at the University of the Witwatersrand. Asante has received several awards for her African cancer equity activism, including the Harvard Global Health Catalyst – 2016 African Ambassador Award. She serves on the 2019 Global Advisory Committee of the NCD Alliance Geneva and is a member of the Lancet High Quality Health Systems Commission People's Voice Advisory Board, USA.                                                                                                                                                                                                                                                                                                                                                    |
| Fathima Paruk        | Clinical and Academic Head of Department and Associate Professor: Department of Critical Care, Steve Biko Academic Hospital and Kalafong Hospital, Faculty of Health Sciences, University of Pretoria, South Africa         | Fathima Paruk previously held the position of Director of the Cardiothoracic ICU at Charlotte Maxeke Johannesburg Academic Hospital, University of the Witwatersrand. Her current positions include being a member of the University of the Witwatersrand Human Research Ethics Committee, serving on the EXCO of the Critical Care Society of Southern Africa (President-Elect) and the Medical and Dental Board of the Health Professions Council of South Africa. She currently chairs the Second Medical Committee of Inquiry for the HPCSA and is a member of the Executive Committee of the HPCSA, Medical and Dental Board. She has served on several ministerially appointed committees including until recently the National Health Research Committee as well as the National Committee for Confidential Enquiries into Maternal Deaths in South Africa. Critical care ethics constitutes one of her many research interests. |
